# Supplementary material
Source: PubMed Central journal article supplement (PMC3903789)

# Figure S1

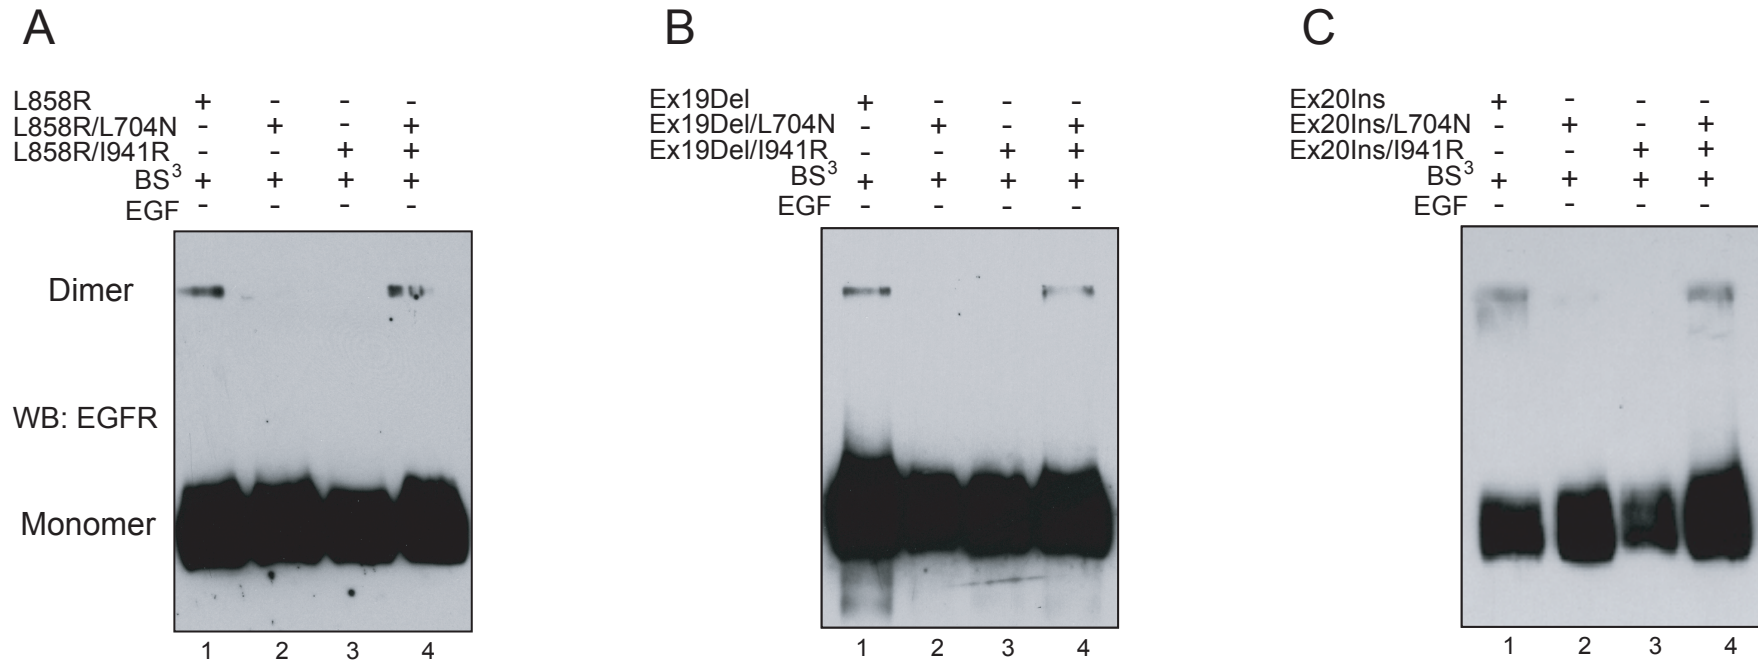

# Figure S2

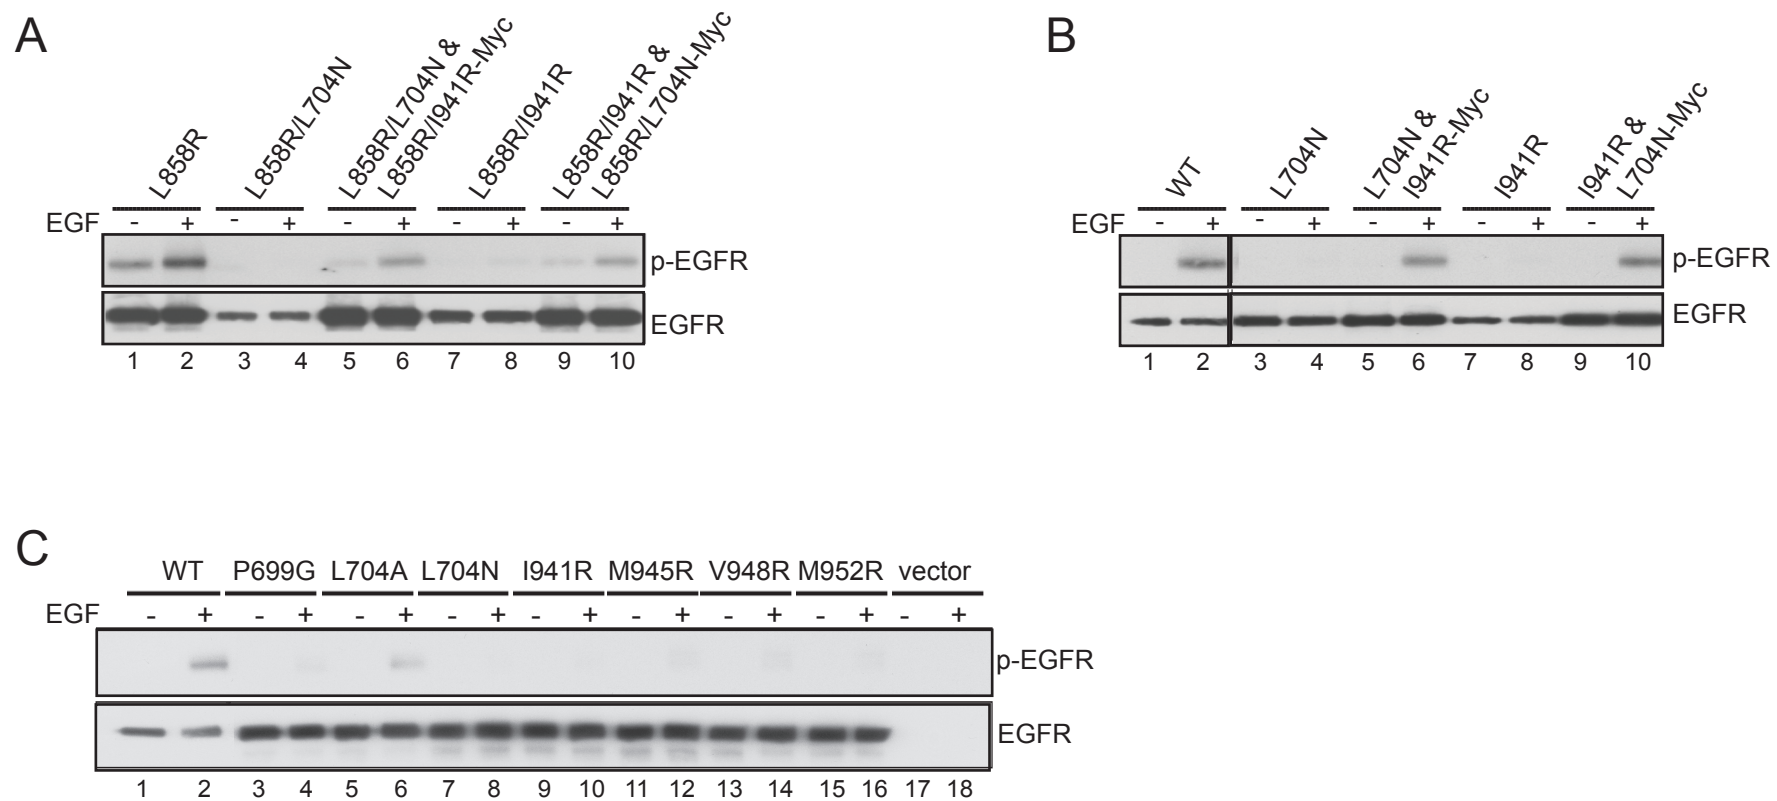

Figure S3

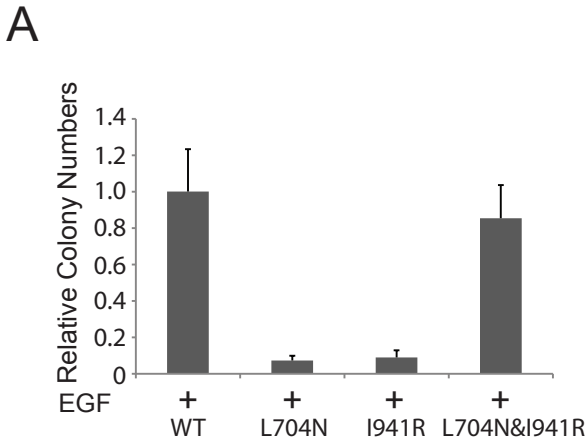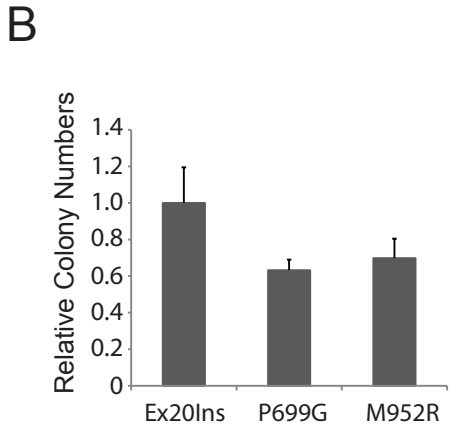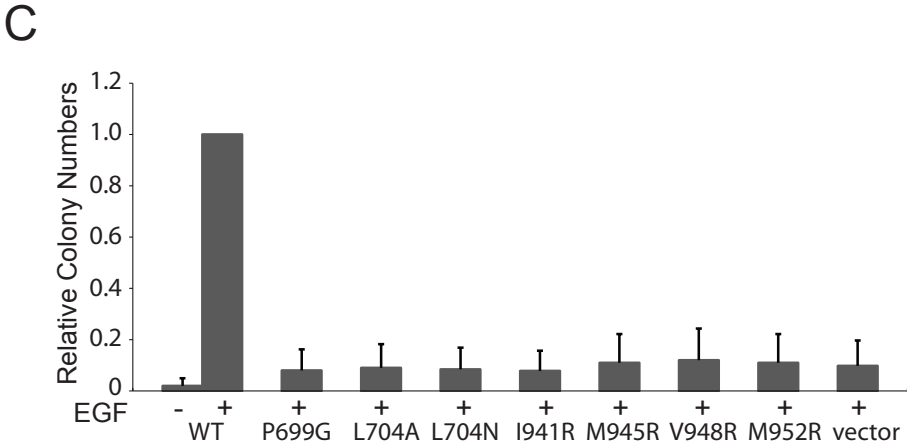

# Figure S4

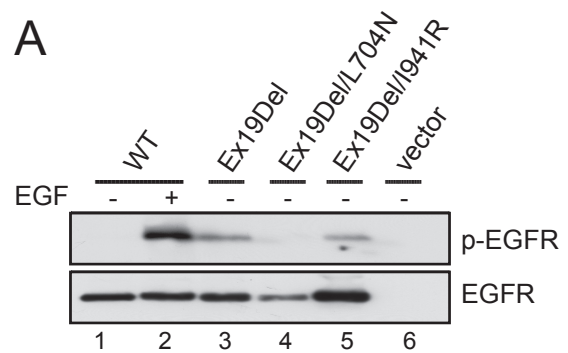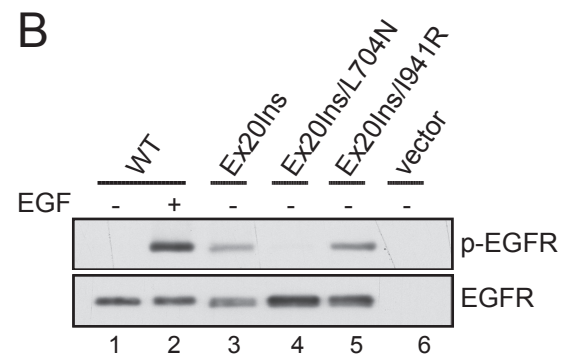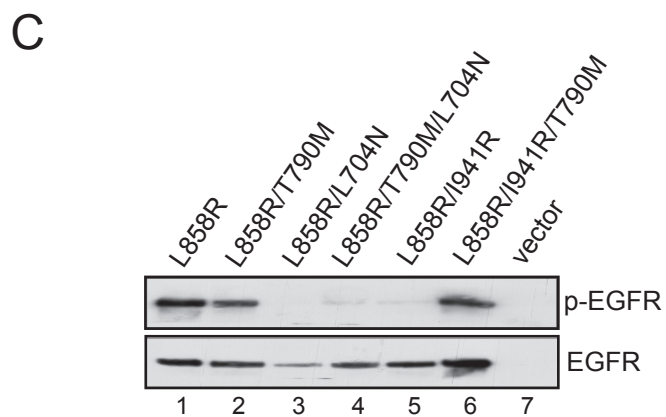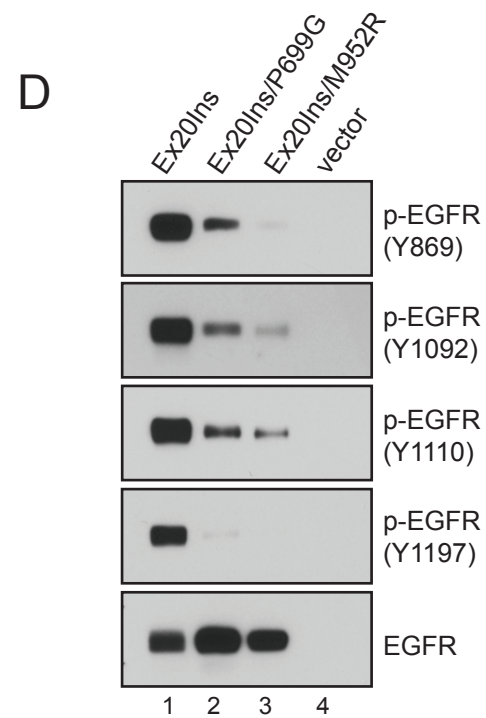



Figure S5

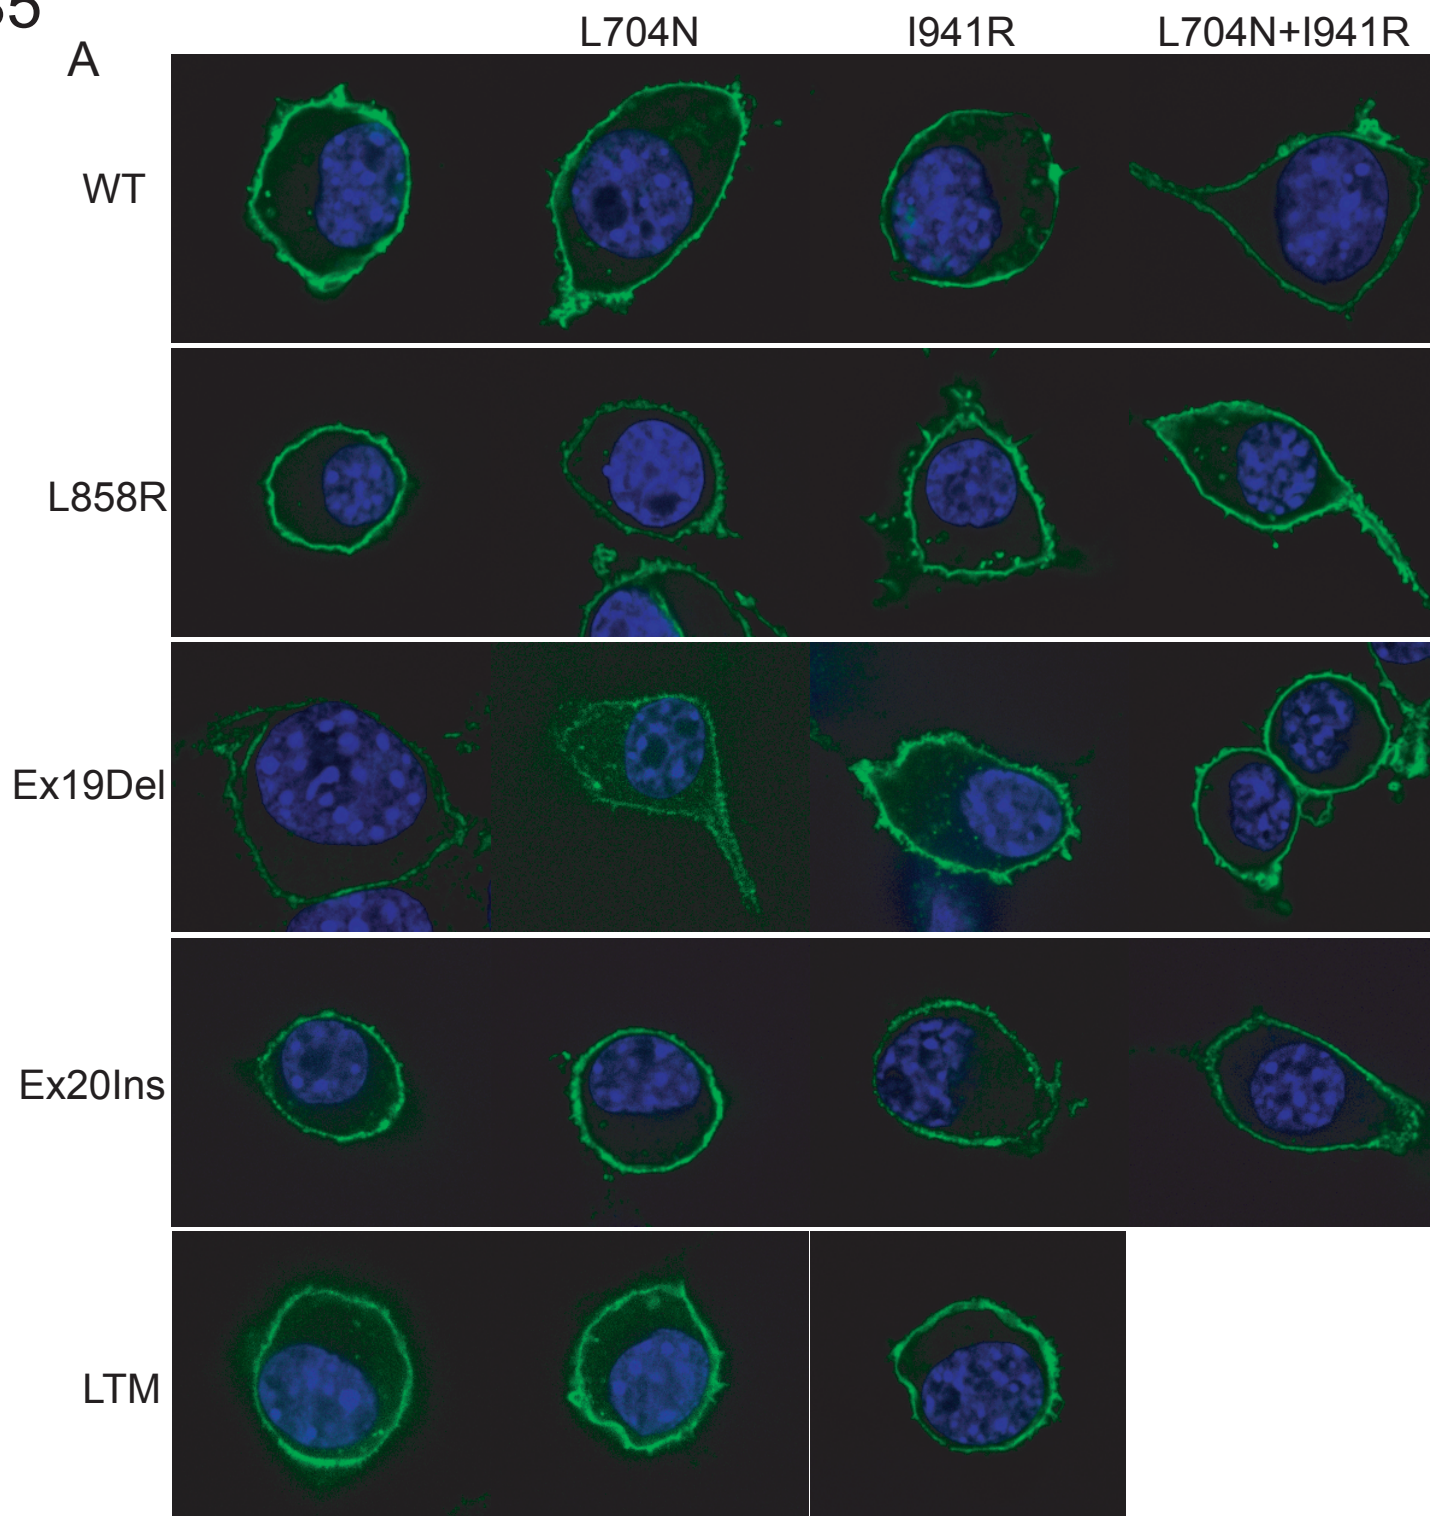

# Figure S5

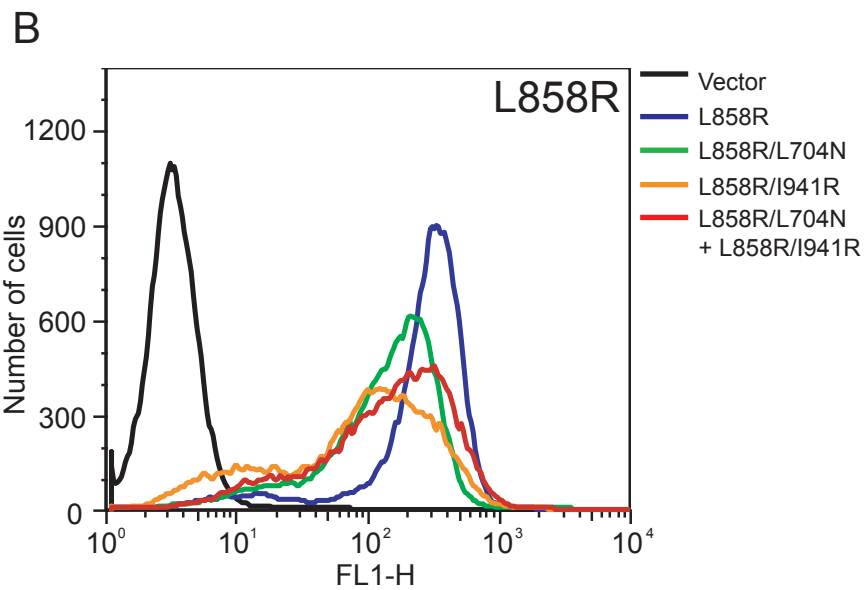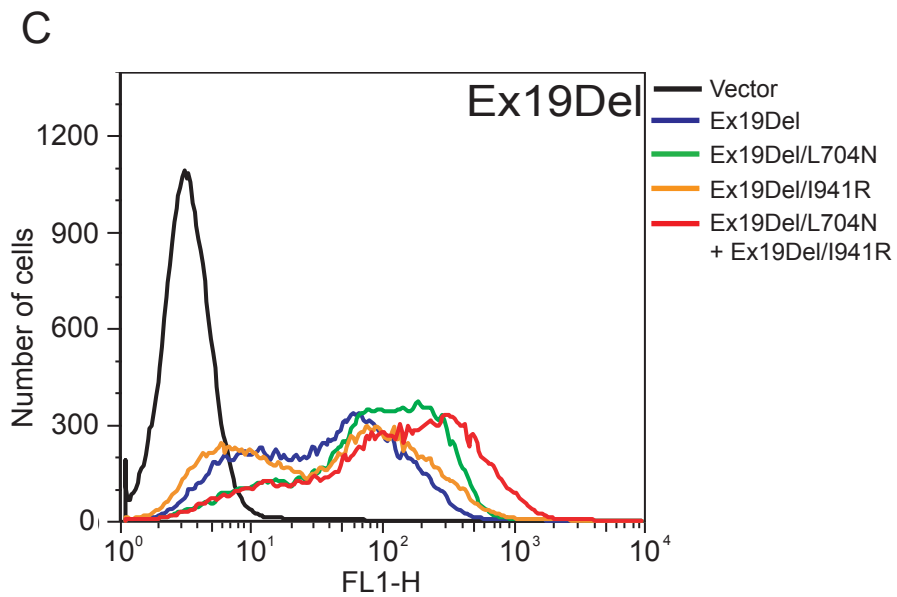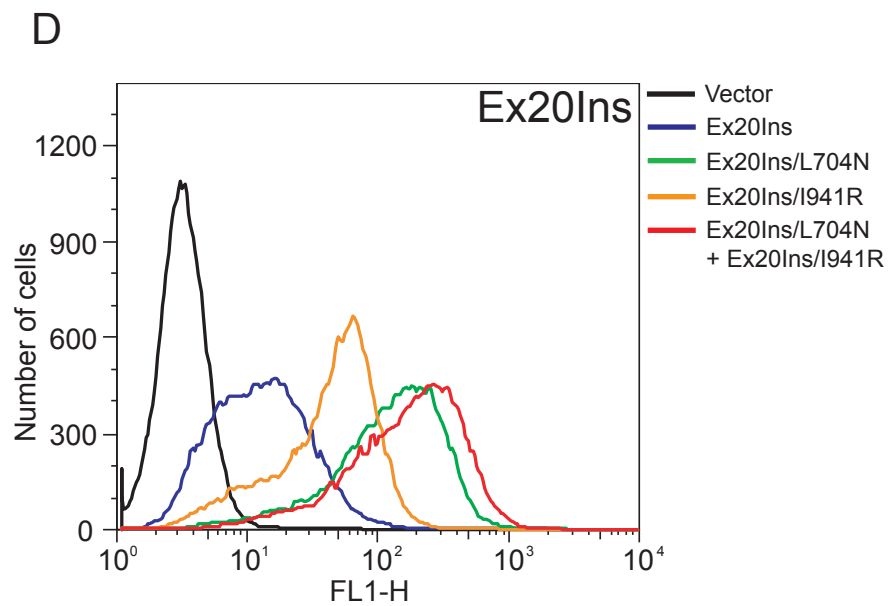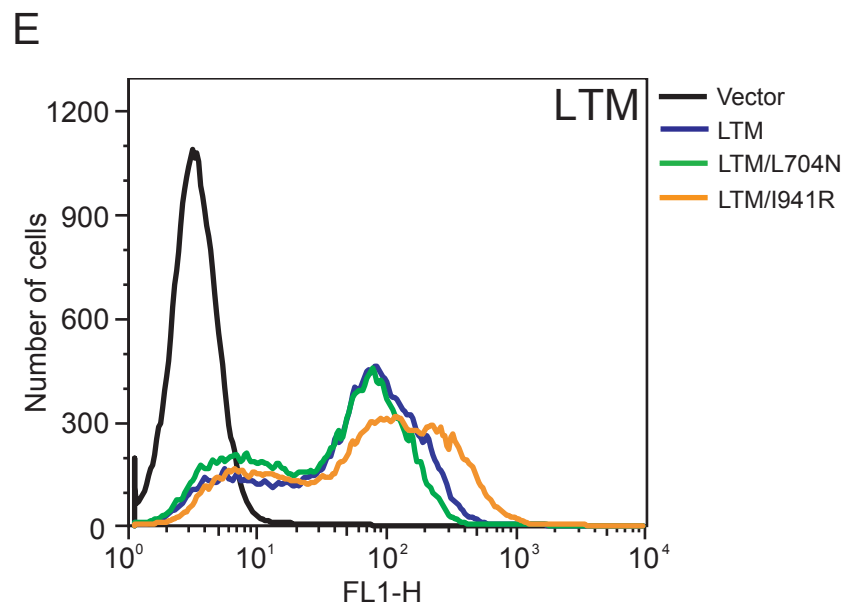

# Figure S6

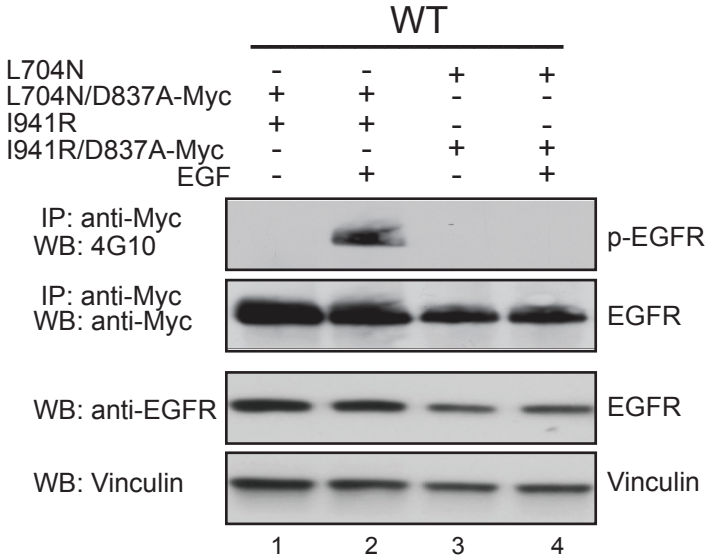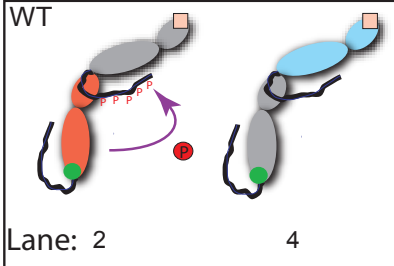

Figure S7

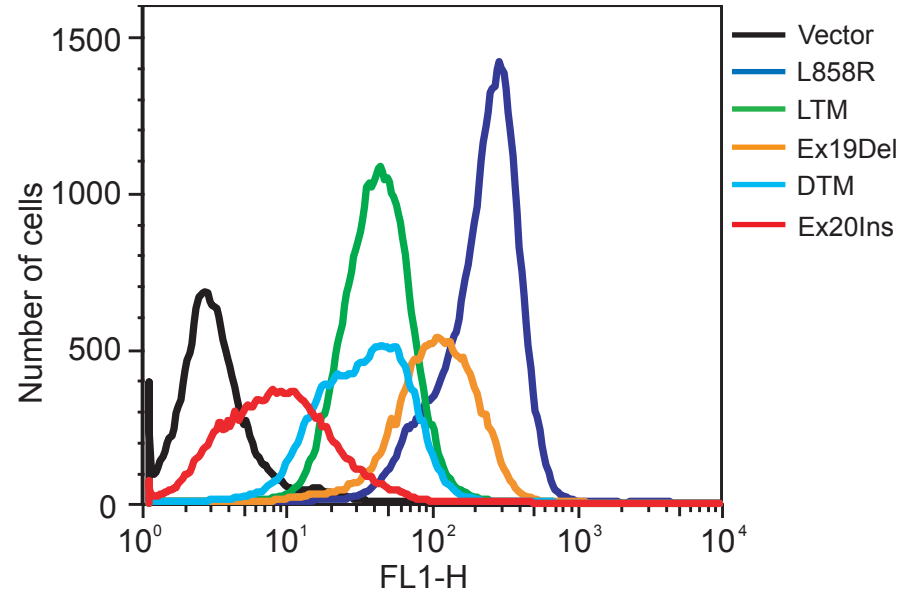

Figure S8

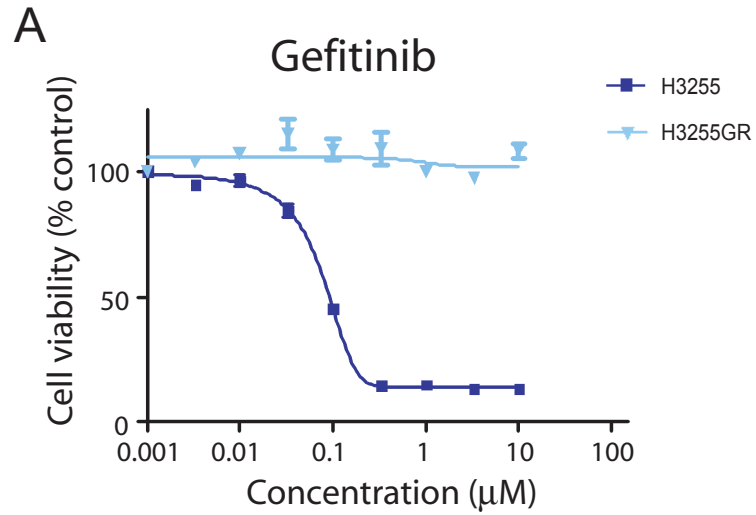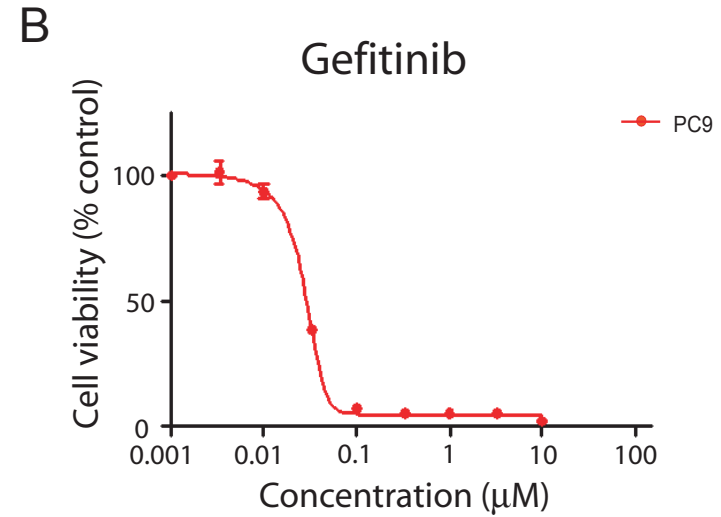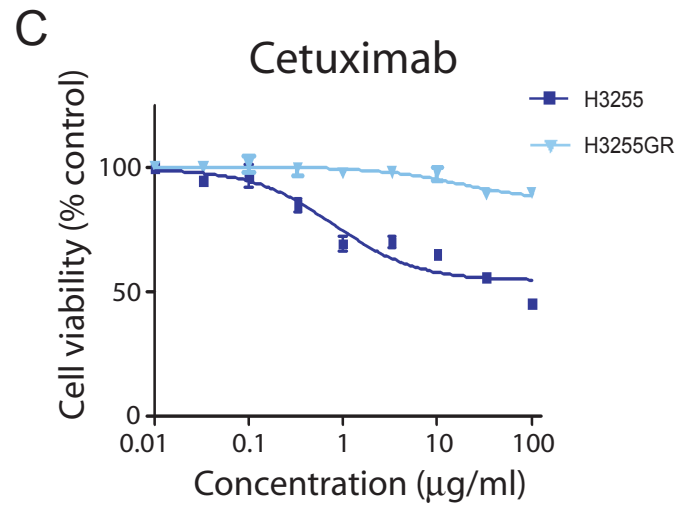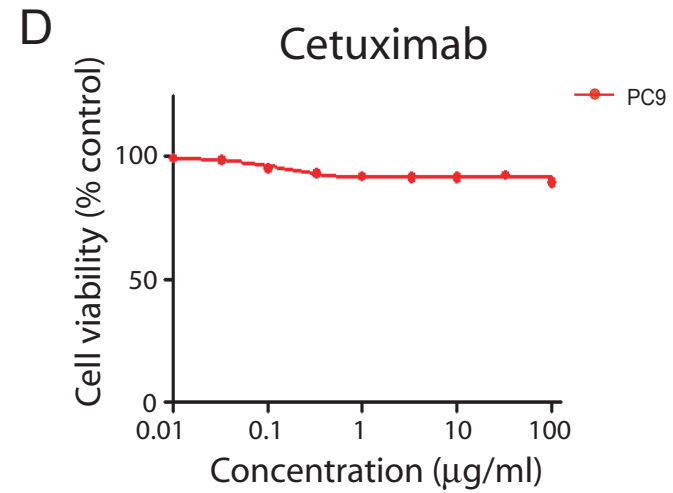

# Figure S9

A

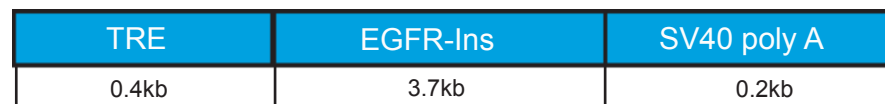

B

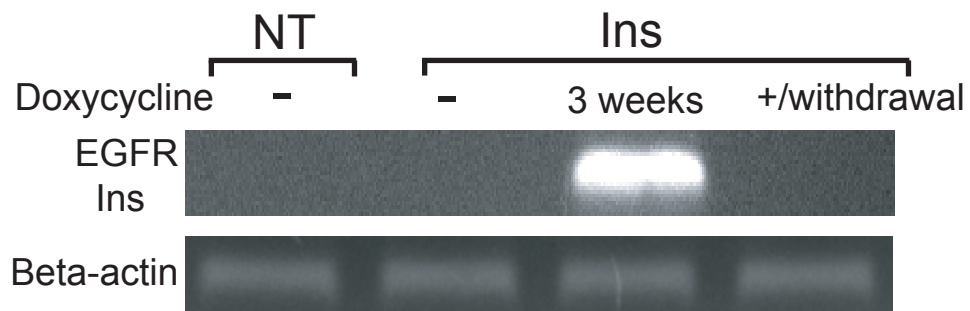

C

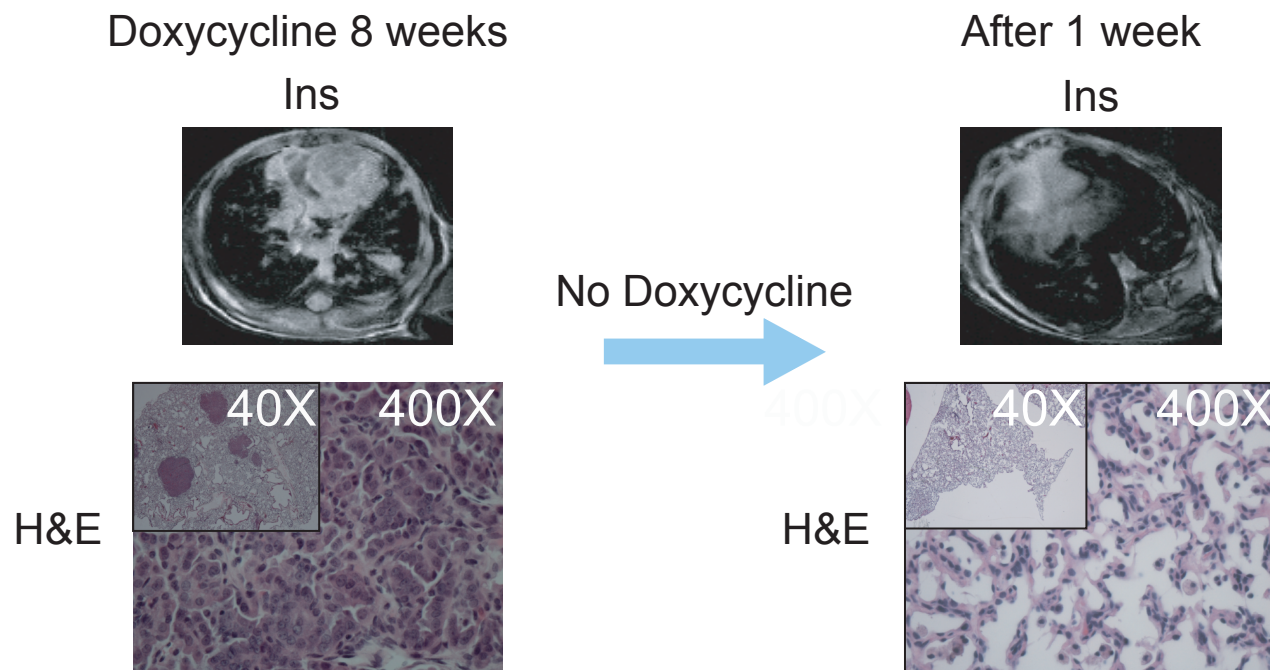

Figure S10

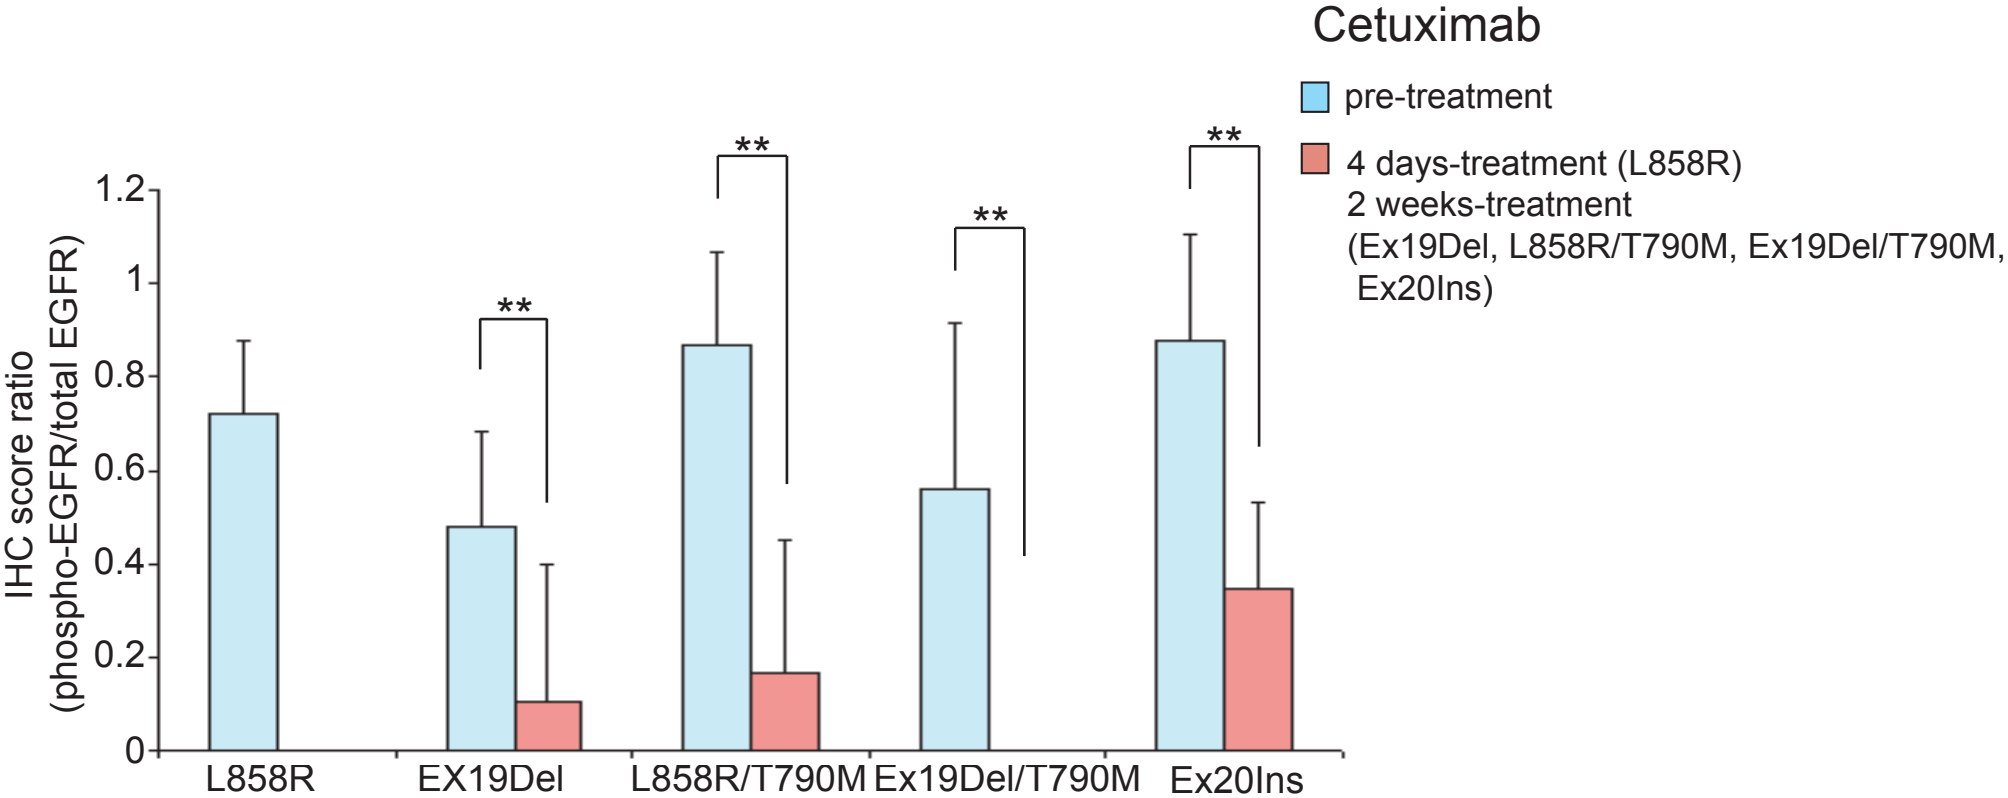

Supplement: NIHMS527688-supplement-1.pdf [file NIHMS527688-supplement-1.pdf]
